# Supplementary material for: Temperature change in pulp chamber of primary teeth during curing of coloured compomers: an in vitro study using pulpal blood microcirculation model
Source: PeerJ. 2019 Jul 8;7:e7284. doi: 10.7717/peerj.7284 (PMC6622158; doi:10.7717/peerj.7284)
Supplement: Supplemental Information 1 — Each data indicates mean intrapulpal temperature increases measured during light curing process of different coloured compomers in Groups 1–2 and tooth coloured compomers in Group 3. [file peerj-07-7284-s001.xlsx]

## Sheet: Sayfa1
	marka	renk-grup	deney no	10 sn sıcaklık değişimi °C	20 sn sıcaklık değişimi °C	40 sn sıcaklık değişimi °C
1	1	1	1		4.7	6
2	1	1	2		3.7	6.5
3	1	1	3		4.1	6
4	1	1	4		3.6	5.7
5	1	1	5		3.1	5.6
6	1	1	6		4.8	6
7	1	1	7		4	5.3
8	1	2	1		3.8	5
9	1	2	2		3.8	4.9
10	1	2	3		3.9	4.7
11	1	2	4		3.3	4.4
12	1	2	5		3.2	4.6
13	1	2	6		4.6	5.6
14	1	2	7		4.1	5.1
15	1	3	1		3.5	6
16	1	3	2		2.8	4.8
17	1	3	3		4.2	6.7
18	1	3	4		3	5.8
19	1	3	5		3.8	6.3
20	1	3	6		3.9	6.3
21	1	3	7		3.7	6.1
22	1	4	1		4.4	5.4
23	1	4	2		4.2	4.8
24	1	4	3		4.3	5.7
25	1	4	4		3.5	5.2
26	1	4	5		3.9	5.6
27	1	4	6		3.8	5.1
28	1	4	7		3.9	5.2
29	1	5	1		3.9	6
30	1	5	2		4	6.1
31	1	5	3		3.9	5.8
32	1	5	4		4.1	6
33	1	5	5		4.4	6.5
34	1	5	6		3.9	6.2
35	1	5	7		3.8	6.1
36	1	6	1		4.1	6.5
37	1	6	2		3.8	6.8
38	1	6	3		4	6.3
39	1	6	4		4.2	7
40	1	6	5		4.5	7
41	1	6	6		4.2	7.2
42	1	6	7		4.3	6.9
43	1	7	1		4.4	6.5
44	1	7	2		4.1	6.2
45	1	7	3		3.4	5.9
46	1	7	4		3.7	6.1
47	1	7	5		3.9	5.7
48	1	7	6		4.2	6.3
49	1	7	7		4.3	6.5
50	2	8	1		3.2	5.1
51	2	8	2		4.3	5.8
52	2	8	3		3.2	5.3
53	2	8	4		3.6	5.6
54	2	8	5		2.7	4.6
55	2	8	6		4.2	5.5
56	2	8	7		4.4	4.9
57	2	9	1		3.2	5.1
58	2	9	2		3.4	4.4
59	2	9	3		3.9	5.8
60	2	9	4		3.2	4.8
61	2	9	5		3.3	4.6
62	2	9	6		3.5	5.1
63	2	9	7		3.5	5
64	2	10	1		3.2	5.9
65	2	10	2		3.5	6.2
66	2	10	3		3.2	5.8
67	2	10	4		2.8	5.6
68	2	10	5		3	5.9
69	2	10	6		2.8	5.9
70	2	10	7		2.7	5.3
71	2	11	1		3.8	4.8
72	2	11	2		3.6	4.8
73	2	11	3		3.5	4.7
74	2	11	4		3.9	5
75	2	11	5		3.7	4.8
76	2	11	6		3.7	5
77	2	11	7		3.9	4.4
78	2	12	1		3.3	5.2
79	2	12	2		3	5.6
80	2	12	3		2.8	5.2
81	2	12	4		2.8	4.9
82	2	12	5		3.1	5.6
83	2	12	6		2.6	4.9
84	2	12	7		2.8	5.2
85	2	13	1		3.5	5.4
86	2	13	2		3	4.8
87	2	13	3		3.4	5.2
88	2	13	4		3.2	4.9
89	2	13	5		3	4.9
90	2	13	6		2.9	5.3
91	2	13	7		2.6	4.9
92	2	14	1		3.4	4.7
93	2	14	2		3.2	5.5
94	2	14	3		3.7	5.1
95	2	14	4		3.6	5.3
96	2	14	5		4	5.3
97	2	14	6		3.4	4.9
98	2	14	7		4	5.5
99	3	15	1	3.2	3.7	4.9
100	3	15	2	3.4	3.8	4.7
101	3	15	3	3.4	4.3	5.3
102	3	15	4	3.3	3.6	5.6
103	3	15	5	3.3	3.2	4.4
104	3	15	6	3.7	3.2	4.5
105	3	15	7	3.1	3.6	5.3

## Sheet: Sayfa2
Manufacturer Groups 1-2-3		mean ± S.D	Med (min - max)	p	Statistically Significant Different pairs
temperature change (10sec)	3,00	3,34 ± 0,19	3,3 (3,1 - 3,7)	-
temperature change (20sec)	1,00	3,93 ± 0,42	3,9 (2,8 - 4,8)	0.0001*
	2,00	3,35 ± 0,45	3,3 (2,6 - 4,4)		1-2.
	3,00	3,63 ± 0,38	3,6 (3,2 - 4,3)
temperature change (40sec)	1,00	5,88 ± 0,68	6 (4,4 - 7,2)	0.0001*
	2,00	5,18 ± 0,42	5,1 (4,4 - 6,2)		1-2.	1-3.
	3,00	4,96 ± 0,45	4,9 (4,4 - 5,6)
Colour groups (1-15)		mean ± S.D	Med (min - max)	p
temperature change (10sec)	15,00	3,34 ± 0,19	3,3 (3,1 - 3,7)	-
temperature change (20sec)	1,00	4 ± 0,61	4 (3,1 - 4,8)	0.0001*	1-10.	1-12.	1-13.
	2,00	3,81 ± 0,47	3,8 (3,2 - 4,6)		2-10.	2-12.	2-13.
	3,00	3,56 ± 0,5	3,7 (2,8 - 4,2)		4-10.	4-12.	4-13.
	4,00	4 ± 0,32	3,9 (3,5 - 4,4)		5-10.	5-12.	5-13.
	5,00	4 ± 0,2	3,9 (3,8 - 4,4)		6-9.	6-10.	6-12.	6-13.
	6,00	4,16 ± 0,22	4,2 (3,8 - 4,5)		7-10.	7-12.	7-13.
	7,00	4 ± 0,36	4,1 (3,4 - 4,4)		8-12.
	8,00	3,66 ± 0,66	3,6 (2,7 - 4,4)		11-12.
	9,00	3,43 ± 0,24	3,4 (3,2 - 3,9)		12-15.
	10,00	3,03 ± 0,29	3 (2,7 - 3,5)
	11,00	3,73 ± 0,15	3,7 (3,5 - 3,9)
	12,00	2,91 ± 0,23	2,8 (2,6 - 3,3)
	13,00	3,09 ± 0,31	3 (2,6 - 3,5)
	14,00	3,61 ± 0,31	3,6 (3,2 - 4)
	15,00	3,63 ± 0,38	3,6 (3,2 - 4,3)
temperature change (40sec)	1,00	5,87 ± 0,38	6 (5,3 - 6,5)	0.0001*	1-2.	1-6.	1-9.	1-11.	1-13.	1-14.	1-15.
	2,00	4,9 ± 0,39	4,9 (4,4 - 5,6)		2-3.	2-5.	2-6.	2-7.	2-10.
	3,00	6 ± 0,6	6,1 (4,8 - 6,7)		3-4.	3-6.	3-8.	3-9.	3-11.	3-12.	3-13.	3-14.	3-15.
	4,00	5,29 ± 0,31	5,2 (4,8 - 5,7)		4-5.	4-6.	4-7.
	5,00	6,1 ± 0,22	6,1 (5,8 - 6,5)		5-6.	5-8.	5-9.	5-11.	5-12.	5-13.	5-14.	5-15.
	6,00	6,81 ± 0,31	6,9 (6,3 - 7,2)		6-8.	6-9.	6-10.	6-11.	6-12.	6-13.	6-14.	6-15.
	7,00	6,17 ± 0,3	6,2 (5,7 - 6,5)		7-8.	7-9.	7-11.	7-12.	7-13.	7-14.	7-15.
	8,00	5,26 ± 0,42	5,3 (4,6 - 5,8)		9-10.
	9,00	4,97 ± 0,45	5 (4,4 - 5,8)		10-11.	10-13.	10-15.
	10,00	5,8 ± 0,28	5,9 (5,3 - 6,2)
	11,00	4,79 ± 0,2	4,8 (4,4 - 5)
	12,00	5,23 ± 0,29	5,2 (4,9 - 5,6)
	13,00	5,06 ± 0,24	4,9 (4,8 - 5,4)
	14,00	5,19 ± 0,3	5,3 (4,7 - 5,5)
	15,00	4,96 ± 0,45	4,9 (4,4 - 5,6)
