# Supplementary material for: Temperature change in pulp chamber of primary teeth during curing of coloured compomers: an in vitro study using pulpal blood microcirculation model
Source: PeerJ. 2019 Jul 8;7:e7284. doi: 10.7717/peerj.7284 (PMC6622158; doi:10.7717/peerj.7284)
Supplement: Supplemental Information 2 [file peerj-07-7284-s002.xlsx]

## Sheet: Sayfa1
GROUPS		Shapiro-Wilk					Shapiro-Wilk
		Statistic	df	p			Statistic	df	p
temperature change after 20 seconds	1,00	0.954436	10	0.769823	temperature change after 40 seconds	1,00	0.949827	10	0.728122
	2,00	0.944975	10	0.683857		2,00	0.963658	10	0.849437
	3,00	0.941749	10	0.654523		3,00	0.878794	10	0.221149
	4,00	0.949147	10	0.721925		4,00	0.9645	10	0.856283
	5,00	0.838436	10	0.096073		5,00	0.932178	10	0.56957
	6,00	0.985688	10	0.982422		6,00	0.931726	10	0.56567
	7,00	0.944532	10	0.679819		7,00	0.939582	10	0.634957
	8,00	0.905738	10	0.367152		8,00	0.977022	10	0.943875
	9,00	0.870385	10	0.18707		9,00	0.936169	10	0.604492
	10,00	0.924912	10	0.508508		10,00	0.92356	10	0.497557
	11,00	0.934584	10	0.590525		11,00	0.869011	10	0.181961
	12,00	0.938502	10	0.625263		12,00	0.850276	10	0.123618
	13,00	0.9645	10	0.856283		13,00	0.856639	10	0.141216
	14,00	0.918447	10	0.457424		14,00	0.915114	10	0.432411
	15,00	0.909256	10	0.390745		15,00	0.933796	10	0.58363
*. This is a lower bound of the true significance.
a. Lilliefors Significance Correction
